# Supplementary material for: Equivalence of ELISpot Assays Demonstrated between Major HIV Network Laboratories
Source: PubMed Central journal article supplement (PMC3001861; doi:10.1371/journal.pone.0014330), 2010-12-14
Supplement: pone.0014330.s001.pdf [file pone.0014330.s001.pdf]

Supplementary Table 1

| Source of PBMC   | Freeze media                         | Collection processes | HVTN                       | IAVI | HVTN                      | IAVI |
|------------------|--------------------------------------|----------------------|----------------------------|------|---------------------------|------|
|                  |                                      |                      | Median Viability overnight |      | Median recovery overnight |      |
| Duke (n=19)      | 90%FBS/10%<br>DMSO                   | Leukopheresis        | 93                         | 95   | 80                        | 90   |
| HVTN (n=28)      |                                      | Leukopheresis        | 94                         | 96   | 75                        | 80   |
| CLS, IAVI (n=79) |                                      | Buffy Coat           | 93                         | 95   | 75                        | 75   |
| SeraCare (n=24)  | 22% FBS/<br>7.5% DMSO/<br>70.5% RPMI | Leukopheresis        | 94                         | 95   | 65                        | 65   |
